# Supplementary material for: Highly selective conversion of glyceric acid to 3-iodopropionic acid by hydriodic acid mediated hydrogenation
Source: Royal Society of Chemistry journal article supplement (doi:10.1039/c9gc01084j), 2019-01-01
Supplement: c9gc01084j1.pdf [file c9gc01084j1.pdf]

## Supporting Information

### Highly Selective Conversion of Glyceric Acid to 3-Iodopropionic Acid by Hydriodic Acid Mediated Hydrogenation

Teng Li, †<sup>a</sup> Shengqin Liu, †<sup>a</sup> Bing Wang, <sup>b</sup> Jingen Long, <sup>a</sup> Jun Jiang, <sup>a</sup> Ping Jin, <sup>a</sup> Yao Fu, <sup>b</sup> Haizhu Yu <sup>\*b</sup> and Weiran Yang <sup>\*a</sup>

a. School of Resources Environmental and Chemical Engineering, Nanchang University, Nanchang 330031, Jiangxi, China. \*Email: [wyang16@ncu.edu.cn](mailto:wyang16@ncu.edu.cn).

b. Hefei National Laboratory for Physical Sciences at the Microscale, iChEM, CAS Key Laboratory of Urban Pollutant Conversion, Anhui Province Key Laboratory of Biomass Clean Energy, Department of Chemistry, University of Science and Technology of China, Hefei 230026, Anhui, China. \*E-mail: [yuhaizhu@ahu.edu.cn](mailto:yuhaizhu@ahu.edu.cn).

\* To whom correspondence should be addressed. Email: [wyang16@ncu.edu.cn](mailto:wyang16@ncu.edu.cn).

The conversion and yield were calculated as following:

$$n(\text{GA}) = m(\text{GA}) / 106$$

$$n(\text{DIPA}) = m(\text{DIPA}) / 200$$

$$n(3\text{-IPA}) = m(3\text{-IPA}) / 326$$

$$\text{Conversion of GA} = [1 - n(\text{GA after reaction}) / n(\text{GA before reaction})] \times 100\%$$

$$\text{Yield of DIPA} = n(\text{DIPA after reaction}) / n(\text{GA before reaction}) \times 100\%$$

$$\text{Yield of 3-IPA} = n(3\text{-IPA after reaction}) / n(\text{GA before reaction}) \times 100\%$$

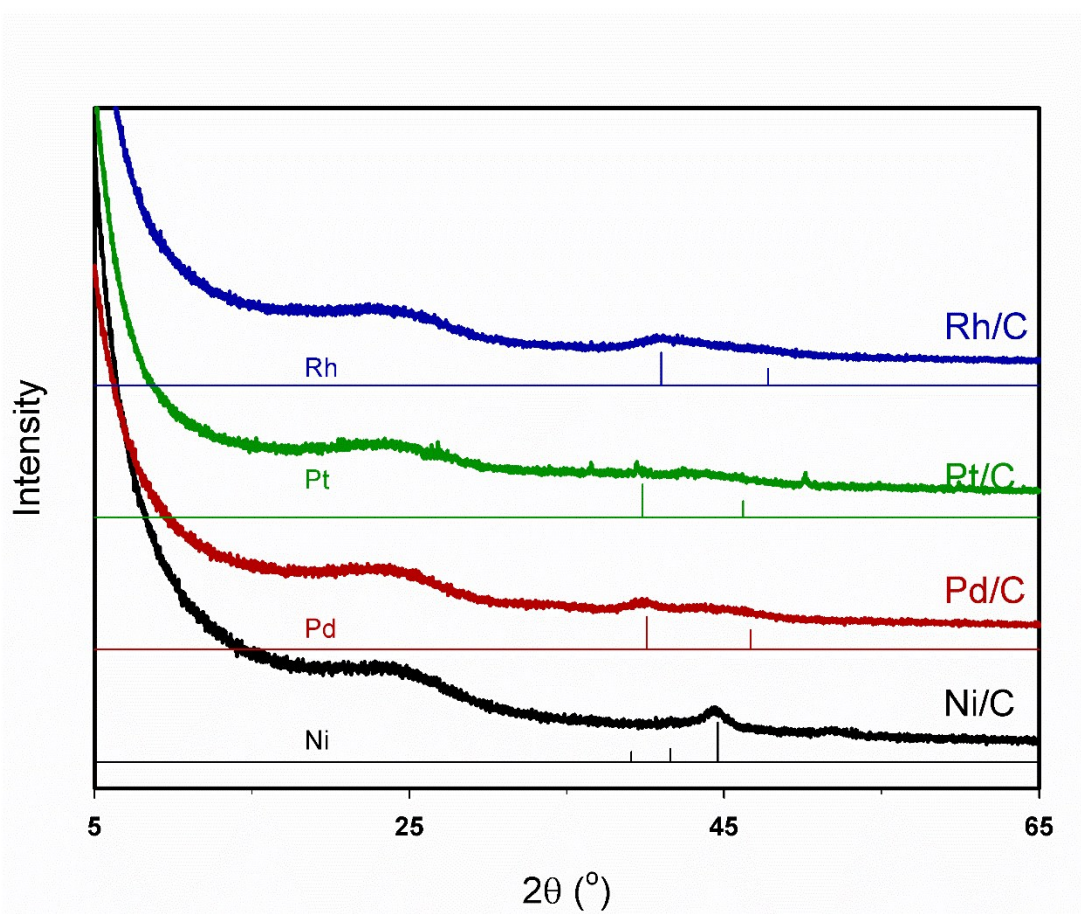

**Figure S1.** X-ray diffraction patterns of different metal catalysts

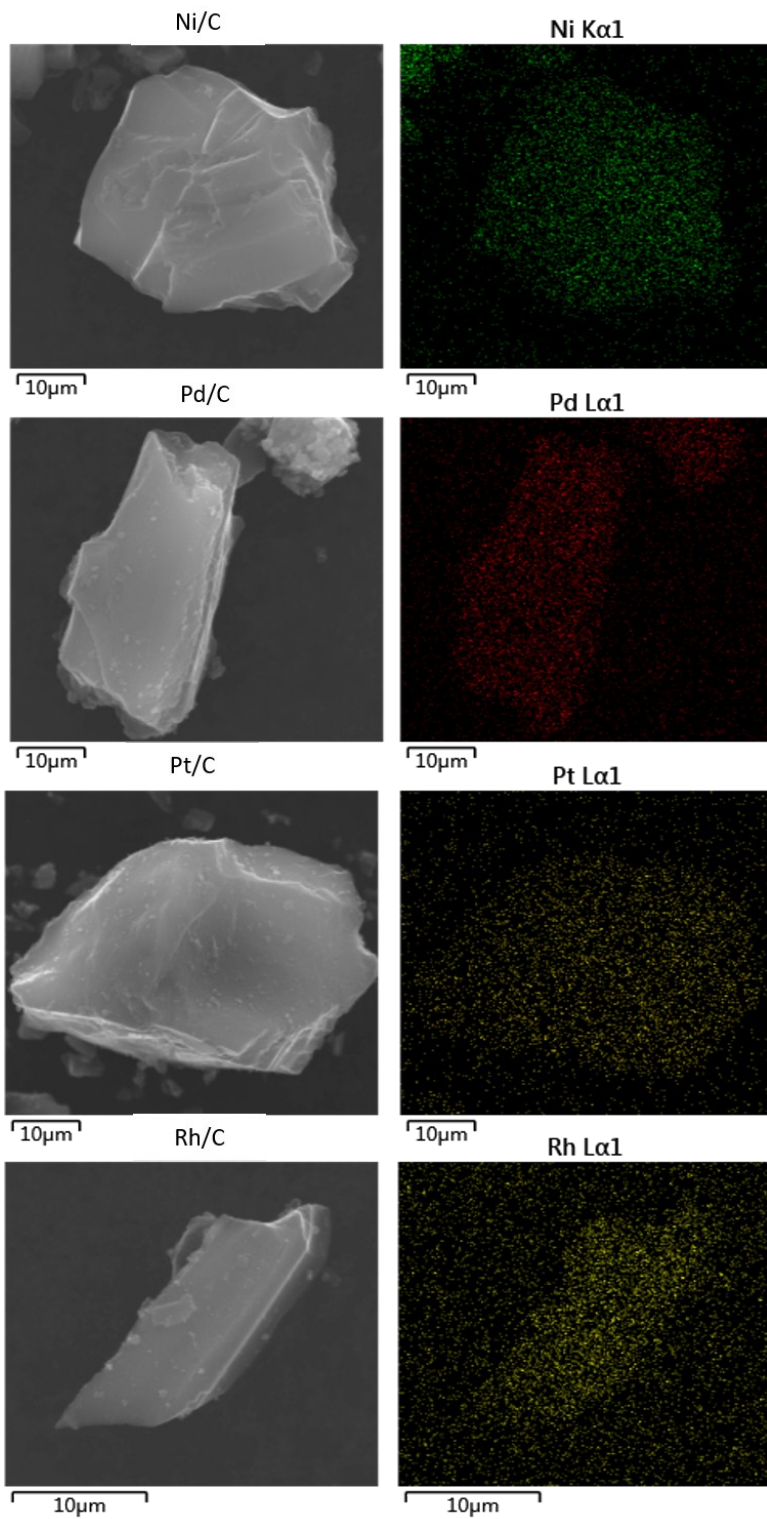

**Figure S2.** SEM-EDS elemental mapping of different metal catalysts

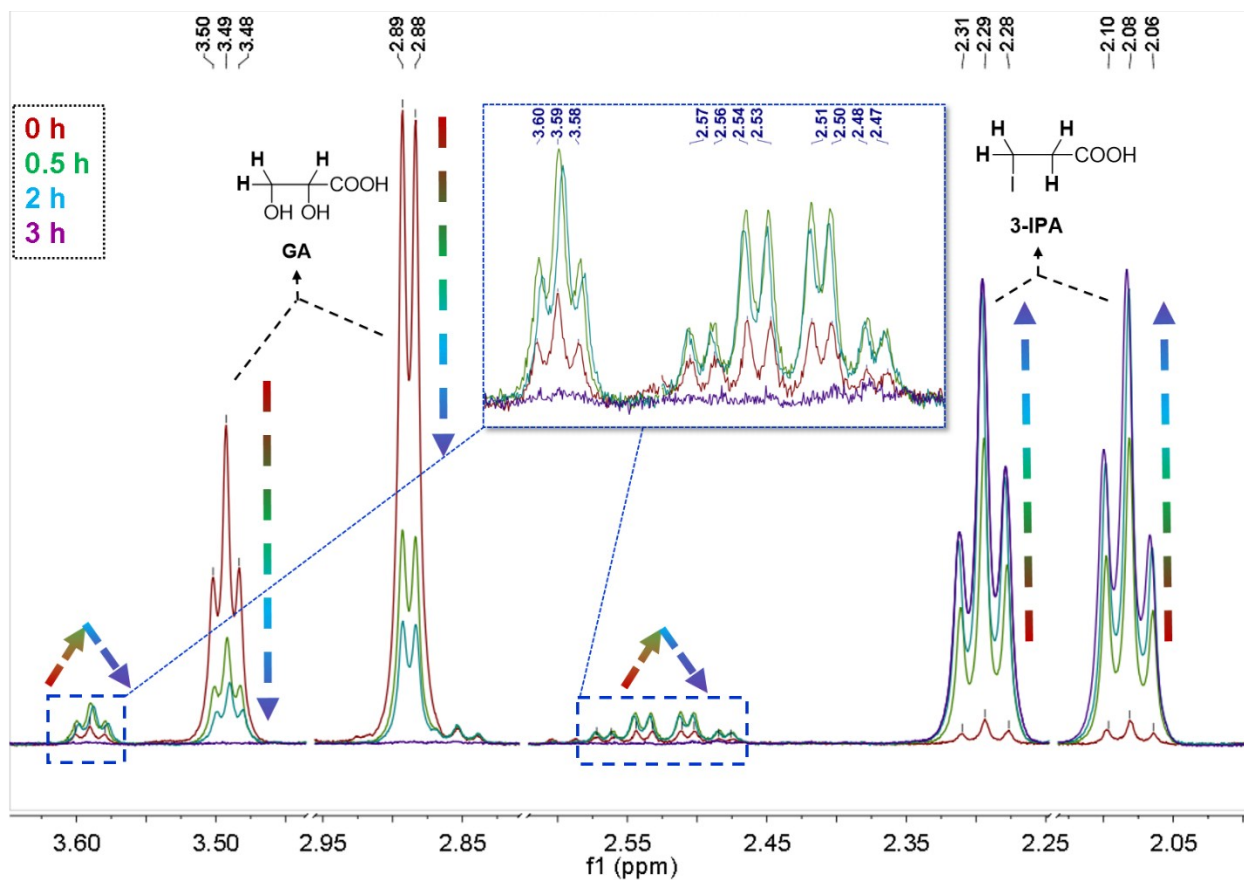

**Figure S3.**  $^1\text{H}$  NMR spectrum for reaction liquid in different reaction time (GA: Glyceric acid; 3-IPA: 3-iodopropionic acid). Reaction conditions: 0.56 g 20wt% GA aqueous solution (0.84 mmol GA), 4.5 mL 57wt% hydroiodic acid,  $\text{I}_2$  0.65 g, 5wt% Rh/C 0.05 g, 373 K, initial  $\text{H}_2$  pressure 400 psi, 400 rpm.

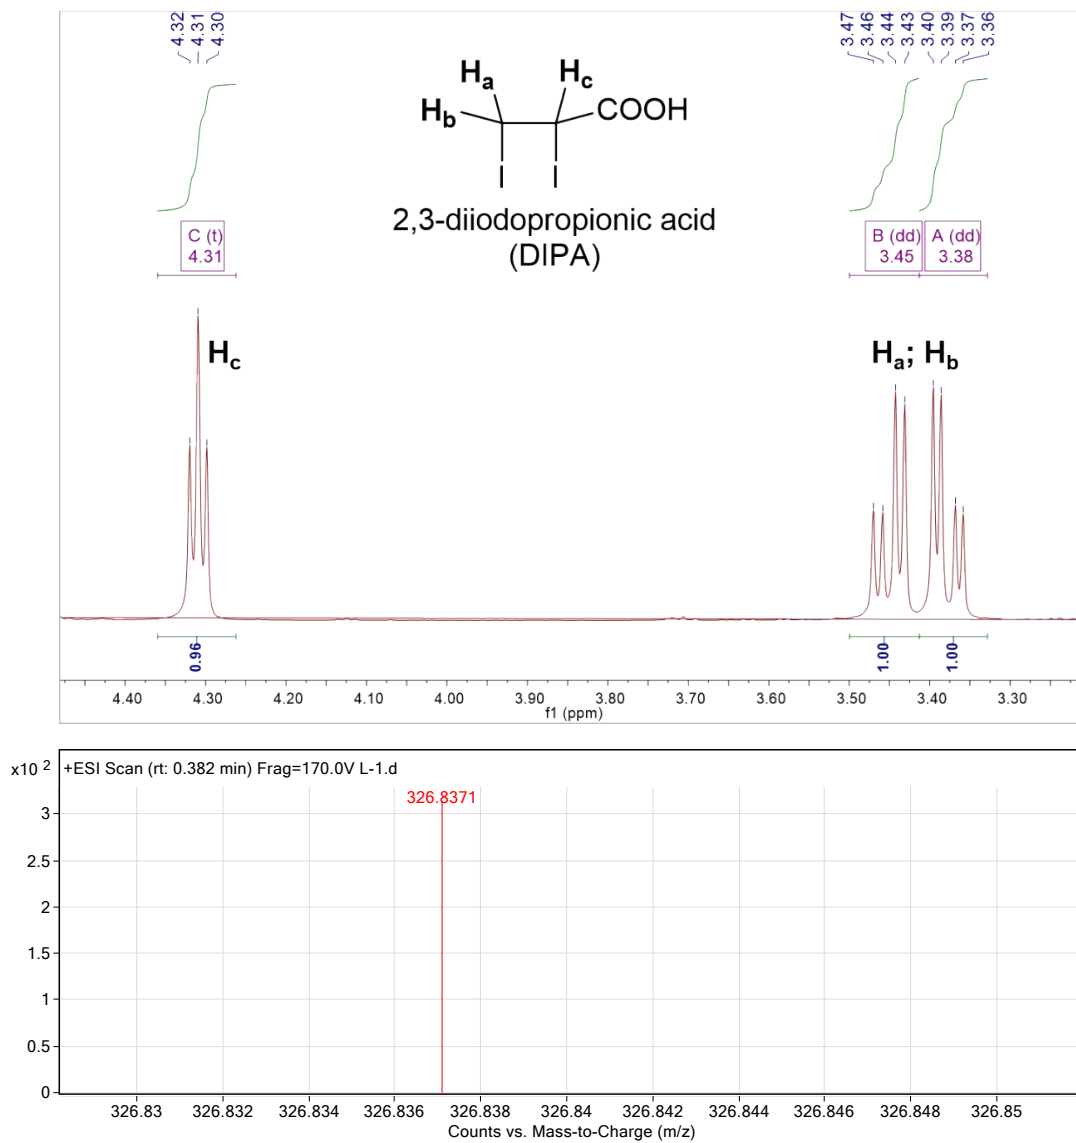

**Figure S4.** <sup>1</sup>H NMR spectrum by 400M NMR (Top) and MS spectrum (Bottom) for intermediate

**Table S1.** Hydrolysis of 3-IPA and iodination reaction of 3-HPA catalyzed by HI

| Entry            | Reactant | Solvent     | Conversion (%) | Product | Yield (%) |
|------------------|----------|-------------|----------------|---------|-----------|
| 1 <sup>[a]</sup> | 3-IPA    | Water       | 75.8           | 3-HPA   | 69.4      |
| 2 <sup>[b]</sup> | 3-HPA    | Water       | N. D.          | 3-IPA   | N. D.     |
| 3 <sup>[b]</sup> | 3-HPA    | Cyclohexane | 5.4            | 3-IPA   | 5.0       |

Reaction conditions: Reactant 0.84 mmol, 5wt% Rh/C 0.1g, solvent 5 mL, 373 K, 1 h, 400 rpm, initial H<sub>2</sub> pressure 400 psi; [a] 22wt% HI; [b] I<sub>2</sub> 2 mmol (equal to 9.0wt% HI).

### **Method for the calculation of the reaction rate constants ( $k$ ) and reaction order ( $n$ )**

As the conversion is low, the conversion is linearly related with time, and

$$r \approx (a - a_t)/t,$$

$$r = k * a^n,$$

$$\text{namely } \ln r = \ln k + n * \ln a,$$

where  $r$  is the reaction rate,  $a$  is the initial concentration of reactant, and  $a_t$  is the concentration of reactant at  $t$  h.

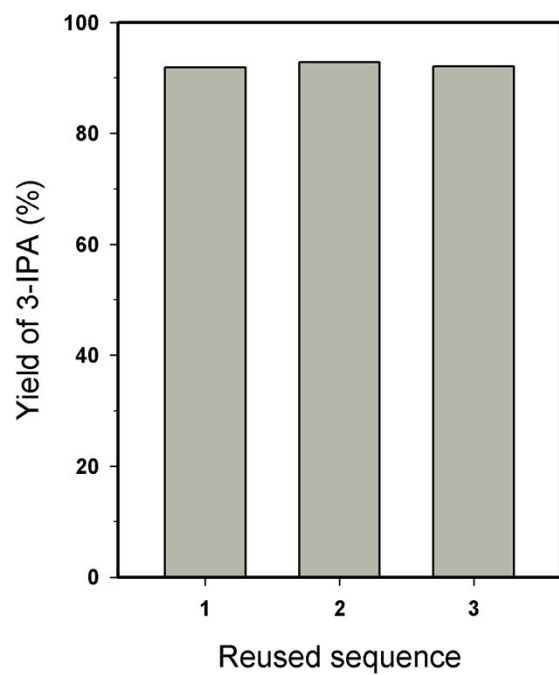

**Figure S5.** Reused test of HI-Rh reaction system. Reaction conditions: 0.56 g 20wt% GA aqueous solution (0.84 mmol GA), 15  $\mu\text{mol}$   $\text{RhCl}_3$ , 4.5 ml 57wt% hydroiodic acid, 0.65 g  $\text{I}_2$ , 373 K, 3 h, initial  $\text{H}_2$  pressure 400 psi, 400 rpm.



**Table S2.** The distribution coefficient of 3-IPA in organic solvent and water

| Organic solvent          | Hexane | Cyclohexane | CCl <sub>4</sub> | HCCL <sub>3</sub> | Ether | Hexanol | Tributyl phosphate |
|--------------------------|--------|-------------|------------------|-------------------|-------|---------|--------------------|
| Distribution coefficient | 0      | 0.033       | 0.18             | 0.82              | 10.1  | 38.6    | 49.9               |
